# Supplementary material
Source: PubMed Central journal article supplement (PMC1691391)
Supplement: 12965008s01.pdf [file 12965008s01.pdf]

These are electronic appendices to the paper by Kvist *et al.* 2003 Evolution and genetic structure of the great tit (*Parus major*) complex. *Proc. R. Soc. Lond. B* **270**, 1447--1454. (DOI 10.1098/rspb.2002.2321.)

Electronic appendices are refereed with the text. However, no attempt is made to impose a uniform editorial style on the electronic appendices.

Electronic Appendix A. Sampling sites, subspecies described for the sampling locality, number of individuals sequenced, individual codes (the Martens collection numbers in parentheses) and GenBank accession numbers.

| Locality                 | Subspecies                         | N  | Individual code                                      | GenBank acc. Nr         |
|--------------------------|------------------------------------|----|------------------------------------------------------|-------------------------|
| <b>1</b>                 | <b>major subspecies group</b>      |    |                                                      |                         |
| UK, Glasgow              | <b>2</b> <i>P. m. newtoni</i>      | 10 | TT243-252                                            | AY136804-13             |
| The Netherlands, Veluwe  | <i>P. m. major</i>                 | 1  | TT119                                                | AF542326                |
| The Netherlands, Speuld  | <i>P. m. major</i>                 | 5  | TT120-124                                            | AF542327-31             |
| Estonia, Tartu           | <i>P. m. major</i>                 | 9  | TT108-111, 113-116, 118                              | AF542368-76             |
| Germany, Tübingen        | <i>P. m. major</i>                 | 8  | TT144-151                                            | AF542360-67             |
| Spain, Barcelona         | <i>P. m. major</i>                 | 9  | TT138, 141-43, 152-56                                | AF542309-17             |
| Portugal, Leiria         | <i>P. m. major</i>                 | 8  | TT280-287                                            | AF542261-68             |
| Portugal, Apostica       | <i>P. m. major</i>                 | 6  | TT288-292, 294                                       | AF542269-74             |
| France, Corsica          | <i>P. m. corsus</i>                | 2  | TT177, 178                                           | AF542246, 47            |
| Morocco, near Marrakesch | <i>P. m. excelsus</i>              | 1  | TT364 (MAR169)                                       | AF542300                |
| Sweden, Gotland          | <i>P. m. major</i>                 | 8  | TT51-58                                              | AF542318-25             |
| Finland, Harjavalta      | <i>P. m. major</i>                 | 10 | TT3-4, 13, 19, 21, 27-31                             | AF542332-41             |
| Finland, Oulu            | <b>3</b> <i>P. m. major</i>        | 10 | FTT36, 37, 47, 49, 50, TT126, 130-132                | AF542350-58             |
| Finland, Kilpisjärvi     | <i>P. m. major</i>                 | 8  | TT61-63, FTT105, 155, 156, 184, 206                  | AF542342-49             |
| Russia, Jekaterinburg    | <i>P. m. major</i>                 | 9  | TT181-187, 209, 210                                  | AF542237-45             |
| Russia, Shimanovsk       | <i>P. m. kapustini</i>             | 7  | TT260-263 (MAR1277-80), 270-272 (MAR1462-4)          | AF537962-65, 84-86      |
| Russia, Birakan          | <i>P. m. kapustini</i>             | 8  | TT266-268 (MAR1287-9), 367-371 (MAR1292-6)           | AF537977, 76, 78, 79-83 |
| Kirghizia, Bishkek       | introduced?                        | 5  | TT379-383 (MAR2874-7, 2884)                          | AF542302-06             |
| <b>4</b>                 | <b>bokharensis subspecies</b>      |    |                                                      |                         |
|                          | <b>group</b>                       |    |                                                      |                         |
| Kirghizia, Elterek       | <b>5</b> <i>P. m. ferghanensis</i> | 1  | TT352 (MAR1586)                                      | AF542292                |
| Kirghizia, Sari Tshelek  | <i>P. m. ferghanensis</i>          | 1  | TT353 (MAR1591)                                      | AF542293                |
| Kazakhstan, Chokpak      | <i>P. m. ferghanensis</i>          | 2  | TT385 (MAR2887) note major genotype, TT386 (MAR2888) | AF542307, 08            |
| <b>6</b>                 | <b>cinereus subspecies group</b>   |    |                                                      |                         |
| Nepal, Tumlingtar        | <i>P. m. nipalensis</i>            | 3  | TT362 (MAR2762), 363 (MAR2785), 378 (MAR2761)        | AF542298, 99, AF542301  |
| <b>7</b>                 | <b>minor subspecies group</b>      |    |                                                      |                         |
| Japan, Nagano            | <i>P. m. minor</i>                 | 9  | TT224, 227, 230-236                                  | AF542248-56             |
| Japan, Hokkaido          | <i>P. m. minor</i>                 | 5  | TT343-347 (NEP352-4, 360, 3 61)                      | AF542285-89             |
| North Korea, Naegokri    |                                    | 2  | TT238, 239                                           | AF542257, 58            |

### 7.1.1.1 P. m.

**wladiwosto  
kensis**

|                             |                               |     |                                                                                                                                       |                          |
|-----------------------------|-------------------------------|-----|---------------------------------------------------------------------------------------------------------------------------------------|--------------------------|
| North Korea, Suyangsan      | <i>P. m. wladiwostokensis</i> | 1   | TT241                                                                                                                                 | AF542259                 |
| North Korea, Chayuryong     | <i>P. m. wladiwostokensis</i> | 1   | TT242                                                                                                                                 | AF542260                 |
| Russia, Birakan             | <i>P. m. wladiwostokensis</i> | 10  | TT264 (MAR1285), 265 (MAR1286), 269 (MAR1290), 366 (MAR1291), 372 (MAR1297), 373 (MAR1298), 375-377 (MAR1300-2), note TT267 also here | AF537966-74 AF537975     |
| Russia, Malishevo           | <i>P. m. wladiwostokensis</i> | 3   | TT299 (MAR1305), 301 (MAR1308), 302 (MAR1313)                                                                                         | AF537987-89              |
| Russia, Arseniev            | <i>P. m. wladiwostokensis</i> | 5   | TT303-307 (MAR1314-8)                                                                                                                 | AF542279-83              |
| China, Sichuan, Luo Cheng   | <i>P. m. subtibetanus</i>     | 6   | TT355 (MAR2056), 357-361 (MAR2060-4)                                                                                                  | AF542294, 90, 91, 95- 97 |
| China, Shaanxi, Taiban Shan | <i>P. m. subtibetanus</i>     | 1   | <b>TT295 (MAR837)</b>                                                                                                                 | AF542284                 |
| China, Gansu, Lianhua Shan  | <i>P. m. subtibetanus</i>     | 1   | TT308 (MAR1889)                                                                                                                       | AF532275                 |
| Total                       |                               | 175 |                                                                                                                                       |                          |

Electronic Appendix B. a. Haplotype distribution among *minor* populations. See Electronic Appendix A for origin of the individual codes.

| Haplotype name | Individual codes             | Japan | Amur | Korea | China |
|----------------|------------------------------|-------|------|-------|-------|
| Japan1         | TT224, 227, 231,234, 345-347 | 7     |      |       |       |
| Japan2         | TT230                        | 1     |      |       |       |
| Japan3         | TT232                        | 1     |      |       |       |
| Japan4         | TT233,235,344                | 3     |      |       |       |
| Japan5         | TT236                        | 1     |      |       |       |
| Japan6         | TT343                        | 1     |      |       |       |
| Amur1          | TT265                        |       | 1    |       |       |
| Amur2          | TT267                        |       | 1    |       |       |
| Amur3          | TT269,303,304,308            |       | 3    |       | 1     |
| Amur4          | TT299                        |       | 1    |       |       |
| Amur5          | TT301                        |       | 1    |       |       |
| Amur6          | TT302,306                    |       | 2    |       |       |
| Amur7          | TT366                        |       | 1    |       |       |
| Amur8          | TT372                        |       | 1    |       |       |
| Amur9          | TT373                        |       | 1    |       |       |
| Amur10         | TT375                        |       | 1    |       |       |
| Amur11         | TT376                        |       | 1    |       |       |
| Amur12         | TT377                        |       | 1    |       |       |
| Amur13         | TT305                        |       | 1    |       |       |
| Amur14         | TT307                        |       | 1    |       |       |
| China1         | TT264,357,359,360            |       | 1    |       | 3     |
| China2         | TT295                        |       |      |       | 1     |
| China3         | TT358                        |       |      |       | 1     |
| China4         | TT355                        |       |      |       | 1     |
| China5         | TT361                        |       |      |       | 1     |
| Korea1         | TT238                        |       |      | 1     |       |
| Korea2         | TT239                        |       |      | 1     |       |
| Korea3         | TT241                        |       |      | 1     |       |
| Korea4         | TT242                        |       |      | 1     |       |

Electronic Appendix B. b. Haplotype distribution among *major* populations. See Electronic Appendix A. for origin of the individual codes. UK= United Kingdom, NL = the Netherlands, Ge = Germany, Es = Estonia, Co = Corsica, Po = Portugal, Sp = Spain, Mo = Morocco, Sw = Sweden, Fi = Finland, Ur = the Urals, KK = Kirghizia and Kazakhstan, Am = Amur.

| Haplotype | Individual codes                                                                                                                                                                                                        | UK | NL | Ge | Es | Co | Po | Sp | Mo | Sw | Fi | Ur | KK | Am |
|-----------|-------------------------------------------------------------------------------------------------------------------------------------------------------------------------------------------------------------------------|----|----|----|----|----|----|----|----|----|----|----|----|----|
| Common    | 52,55,56,61,62,109,113,1<br>14,116,119,120,122,<br>123,126,130,131,132,<br>136,143, 144,145,151,<br>153,156,182,184,210,<br>245,250,251,267,270,<br>280,283,289,367,368,<br>369,370,371,385,F36,<br>F37, F49, F105,F156 | 3  | 4  | 3  | 4  |    | 3  | 3  |    | 3  | 12 | 3  | 1  | 7  |
| J1        | TT181                                                                                                                                                                                                                   |    |    |    |    |    |    |    |    |    |    |    | 1  |    |
| J2        | TT183                                                                                                                                                                                                                   |    |    |    |    |    |    |    |    |    |    |    | 1  |    |
| J3        | TT185                                                                                                                                                                                                                   |    |    |    |    |    |    |    |    |    |    |    | 1  |    |
| J4        | TT186                                                                                                                                                                                                                   |    |    |    |    |    |    |    |    |    |    |    | 1  |    |
| J5        | TT187                                                                                                                                                                                                                   |    |    |    |    |    |    |    |    |    |    |    | 1  |    |
| J6        | TT209,53                                                                                                                                                                                                                |    |    |    |    |    |    |    |    | 1  |    | 1  |    |    |
| C1        | TT177, 178                                                                                                                                                                                                              |    |    |    |    | 2  |    |    |    |    |    |    |    |    |
| G1        | TT243                                                                                                                                                                                                                   | 1  |    |    |    |    |    |    |    |    |    |    |    |    |
| G2        | TT54,244,247                                                                                                                                                                                                            | 2  |    |    |    |    |    |    |    | 1  |    |    |    |    |
| G3        | TT246                                                                                                                                                                                                                   | 1  |    |    |    |    |    |    |    |    |    |    |    |    |
| G4        | TT248,249,252                                                                                                                                                                                                           | 3  |    |    |    |    |    |    |    |    |    |    |    |    |
| A1        | TT260                                                                                                                                                                                                                   |    |    |    |    |    |    |    |    |    |    |    |    | 1  |
| A2        | TT261,266                                                                                                                                                                                                               |    |    |    |    |    |    |    |    |    |    |    |    | 2  |
| A3        | TT57, 118, 262, 263, 268,<br>271, 272                                                                                                                                                                                   |    |    |    | 1  |    |    |    |    | 1  |    |    |    | 5  |
| P1        | TT281,282                                                                                                                                                                                                               |    |    |    |    |    | 2  |    |    |    |    |    |    |    |
| P2        | TT284                                                                                                                                                                                                                   |    |    |    |    |    | 1  |    |    |    |    |    |    |    |
| P3        | TT285                                                                                                                                                                                                                   |    |    |    |    |    | 1  |    |    |    |    |    |    |    |
| P4        | TT286                                                                                                                                                                                                                   |    |    |    |    |    | 1  |    |    |    |    |    |    |    |
| P5        | TT287                                                                                                                                                                                                                   |    |    |    |    |    | 1  |    |    |    |    |    |    |    |
| P6        | TT115, 155, 288, 292                                                                                                                                                                                                    |    |    |    | 1  |    | 2  | 1  |    |    |    |    |    |    |
| P7        | TT290                                                                                                                                                                                                                   |    |    |    |    |    | 1  |    |    |    |    |    |    |    |
| P8        | FTT184, TT291                                                                                                                                                                                                           |    |    |    |    |    | 1  |    |    |    | 1  |    |    |    |
| P9        | TT294                                                                                                                                                                                                                   |    |    |    |    |    | 1  |    |    |    |    |    |    |    |
| M         | TT364                                                                                                                                                                                                                   |    |    |    |    |    |    |    | 1  |    |    |    |    |    |
| Ki1       | TT379,381                                                                                                                                                                                                               |    |    |    |    |    |    |    |    |    |    |    |    | 2  |
| Ki2       | TT380                                                                                                                                                                                                                   |    |    |    |    |    |    |    |    |    |    |    |    | 1  |
| Ki3       | TT382                                                                                                                                                                                                                   |    |    |    |    |    |    |    |    |    |    |    |    | 1  |
| Ki4       | TT383                                                                                                                                                                                                                   |    |    |    |    |    |    |    |    |    |    |    |    | 1  |
| S1        | TT138                                                                                                                                                                                                                   |    |    |    |    |    |    | 1  |    |    |    |    |    |    |
| S2        | TT141                                                                                                                                                                                                                   |    |    |    |    |    |    | 1  |    |    |    |    |    |    |
| S3        | TT142                                                                                                                                                                                                                   |    |    |    |    |    |    | 1  |    |    |    |    |    |    |
| S4        | TT154                                                                                                                                                                                                                   |    |    |    |    |    |    | 1  |    |    |    |    |    |    |
| Go1       | TT51                                                                                                                                                                                                                    |    |    |    |    |    |    |    |    | 1  |    |    |    |    |
| Go2       | TT58, 147                                                                                                                                                                                                               |    |    | 1  |    |    |    |    |    | 1  |    |    |    |    |
| N1        | TT121                                                                                                                                                                                                                   |    | 1  |    |    |    |    |    |    |    |    |    |    |    |
| N2        | TT124                                                                                                                                                                                                                   |    | 1  |    |    |    |    |    |    |    |    |    |    |    |
| Ha1       | TT13                                                                                                                                                                                                                    |    |    |    |    |    |    |    |    |    |    | 1  |    |    |
| Ha2       | TT19                                                                                                                                                                                                                    |    |    |    |    |    |    |    |    |    |    | 1  |    |    |
| Ha3       | TT21                                                                                                                                                                                                                    |    |    |    |    |    |    |    |    |    |    | 1  |    |    |
| Ha4       | TT27                                                                                                                                                                                                                    |    |    |    |    |    |    |    |    |    |    | 1  |    |    |
| Ha5       | TT28, 150, 152                                                                                                                                                                                                          |    |    | 1  |    |    |    | 1  |    |    |    | 1  |    |    |
| Ha6       | TT29                                                                                                                                                                                                                    |    |    |    |    |    |    |    |    |    |    | 1  |    |    |
| Ha7       | TT3                                                                                                                                                                                                                     |    |    |    |    |    |    |    |    |    |    | 1  |    |    |
| Ha8       | TT30                                                                                                                                                                                                                    |    |    |    |    |    |    |    |    |    |    | 1  |    |    |
| Ha9       | TT31                                                                                                                                                                                                                    |    |    |    |    |    |    |    |    |    |    | 1  |    |    |
| Ha10      | TT4                                                                                                                                                                                                                     |    |    |    |    |    |    |    |    |    |    | 1  |    |    |
| K1        | FTT155                                                                                                                                                                                                                  |    |    |    |    |    |    |    |    |    |    | 1  |    |    |

|     |            |   |   |   |
|-----|------------|---|---|---|
| K2  | FTT206     |   |   | 1 |
| K3  | TT63       |   |   | 1 |
| O1  | FTT47      |   |   | 1 |
| O2  | FTT50      |   |   | 1 |
| Ge1 | TT146, 148 | 2 |   |   |
| Ge2 | TT149      | 1 |   |   |
| E1  | TT108      |   | 1 |   |
| E2  | TT110      |   | 1 |   |
| E3  | TT111      |   | 1 |   |

---
